# Supplementary material for: Biologically effective dose (BED) of stereotactic body radiation therapy (SBRT) was an important factor of therapeutic efficacy in patients with hepatocellular carcinoma (≤5 cm)
Source: BMC Cancer. 2019 Aug 28;19:846. doi: 10.1186/s12885-019-6063-9 (PMC6712687; doi:10.1186/s12885-019-6063-9)
Supplement: Supplementary file 1 — The information of the 108 patients involved in the study. (XLSX 15 kb) [file 12885_2019_6063_MOESM1_ESM.xlsx]

## Sheet: Sheet1
Number	Child-Pugh score	ALBI grade	tumor diameter(cm)	AFP (ng/ml)	BED10
1	5	2	4.9	7896	102.6
2	5	2	1.5	4.8	83.3
3	5	2	2.2	1502	100
4	5	1	1.3	3.59	102.6
5	5	1	1.9	61.51	102.6
6	5	2	3.1	1691	102.6
7	5	2	2.3	18.5	102.6
8	5	2	1.6	71.26	100
9	6	1	1.6	890.7	102.6
10	5	2	1.7	2099	83.3
11	5	2	2.7	2.98	100
12	5	1	3.3	27.96	76.8
13	5	1	2.1	262.4	100
14	6	2	3.8	4.95	102.6
15	5	1	3.5	13.22	83.3
16	5	1	1.5	1.43	102.6
17	5	2	1.2	6.96	102.6
18	5	1	3.6	2.6	102.6
19	5	2	1.2	247.9	102.6
20	5	2	4.8	4475	100
21	5	2	1.8	8.46	100
22	5	2	2.1	1.3	102.6
23	6	2	1.4	8.78	100
24	5	2	1.6	63.93	102.6
25	5	2	1.7	6.4	100
26	5	1	2.3	19.26	100
27	5	1	2.5	33.9	102.6
28	5	2	2.9	23.51	100
29	5	2	1.9	11.4	83.3
30	5	2	3.5	11.14	100
31	5	2	0.7	27.32	102.6
32	5	2	4.3	4.46	76.8
33	5	2	2.7	7.86	102.6
34	5	2	1.3	204	102.6
35	5	1	2.3	10.5	100
36	5	1	2.7	245.4	83.3
37	5	2	1.7	276.9	100
38	5	2	3.2	223	102.6
39	5	2	1.3	46.3	100
40	6	2	2.7	2.01	102.6
41	6	2	2.2	5.62	100
42	5	1	2.4	15	102.6
43	5	2	2.8	19.21	100
44	5	2	2	2.77	102.6
45	5	2	3.5	250.5	102.6
46	5	2	2.3	52.49	100
47	5	2	3.8	122.5	102.6
48	5	1	3.5	7765	76.8
49	5	1	4.5	392.6	100
50	5	1	1.1	647.9	100
51	6	2	3.9	92.93	102.6
52	5	2	3.8	2.19	83.3
53	5	2	2.1	2.56	102.6
54	5	2	2.2	144	83.3
55	5	1	1	243.3	100
56	5	2	2.3	11	102.6
57	6	2	1	2.67	102.6
58	5	2	1.6	3.54	100
59	5	1	2.4	45.19	100
60	5	2	2.2	107.4	83.3
61	6	2	2.2	12.61	100
62	5	1	4.2	192	102.6
63	5	2	2.8	2.2	102.6
64	5	2	1.7	9.65	102.6
65	5	2	3.5	0.82	83.3
66	5	1	3	83.71	102.6
67	5	2	4.8	1.12	100
68	5	2	3.1	4.36	76.8
69	5	1	2.3	1931	100
70	5	2	4.2	777.8	100
71	5	1	1.6	115	100
72	5	2	4.1	746.4	83.3
73	6	1	4.5	4.24	83.3
74	6	2	0.8	41.16	83.3
75	5	2	3.4	4.19	102.6
76	5	1	4.3	69.01	76.8
77	5	1	1.5	223.7	76.8
78	5	1	2.1	3.82	76.8
79	5	2	2.9	33.17	100
80	5	2	2.3	42.05	100
81	5	2	3.2	282.8	100
82	5	2	1	38.35	76.8
83	5	2	1.2	1.08	102.6
84	5	2	1.9	213.7	100
85	5	2	3.8	83.4	102.6
86	5	2	3.3	6859	102.6
87	5	2	2.3	1533	83.3
88	5	2	2.4	203.1	100
89	5	2	2.8	648.2	102.6
90	5	2	2	3.46	100
91	5	2	2.8	8.17	100
92	5	1	1.4	4.87	100
93	5	1	3.6	4.17	83.3
94	5	2	3.8	1000	100
95	5	1	3.9	2.11	102.6
96	5	2	2.9	249	83.3
97	5	2	1	2.5	100
98	5	2	3.5	525.1	102.6
99	5	2	1.6	49.97	83.3
100	5	1	3.2	4.86	100
101	5	2	4	1000	102.6
102	5	2	1.4	2.38	102.6
103	5	1	2.7	503.8	102.6
104	6	2	2	234.2	100
105	5	2	1.7	2.19	102.6
106	5	1	4.2	564	102.6
107	5	1	2.7	1.01	102.6
108	5	1	1.5	1692	102.6
Note of 108 patients involved in the study, 80 were male and 28 were female; The median age was 54 (37-77) years old.
